# Supplementary material
Source: PubMed Central journal article supplement (PMC4575547)
Supplement: Supp_Figure1.pdf [file Supp_Figure1.pdf]

## Supplementary Data

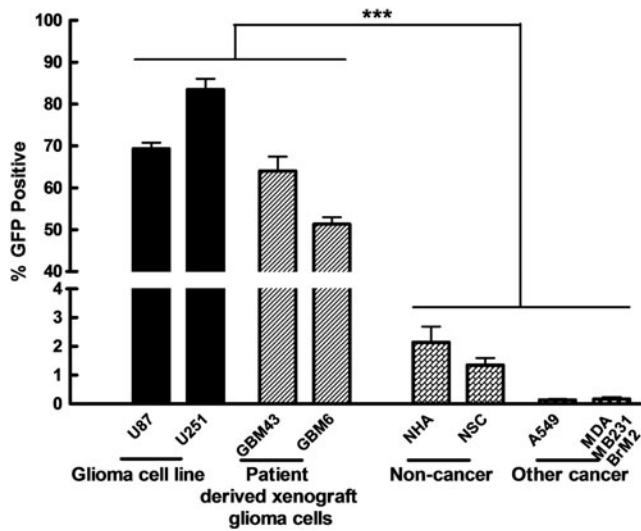

**Supplementary Figure S1.** Infection rates of Ad5GliomaFF-CMV-GFP on various cell lines. The infection rate acquired from Fig. 3a–c with Ad5-GliomaFF-CMV-GFP was reconstituted to statistically analyze the infectivity difference between glioma cell lines and nonglioma cell lines. \*\*\* $p < 0.001$ .
