# Supplementary material
Source: PubMed Central journal article supplement (PMC4575547)
Supplement: Supp_Figure2.pdf [file Supp_Figure2.pdf]

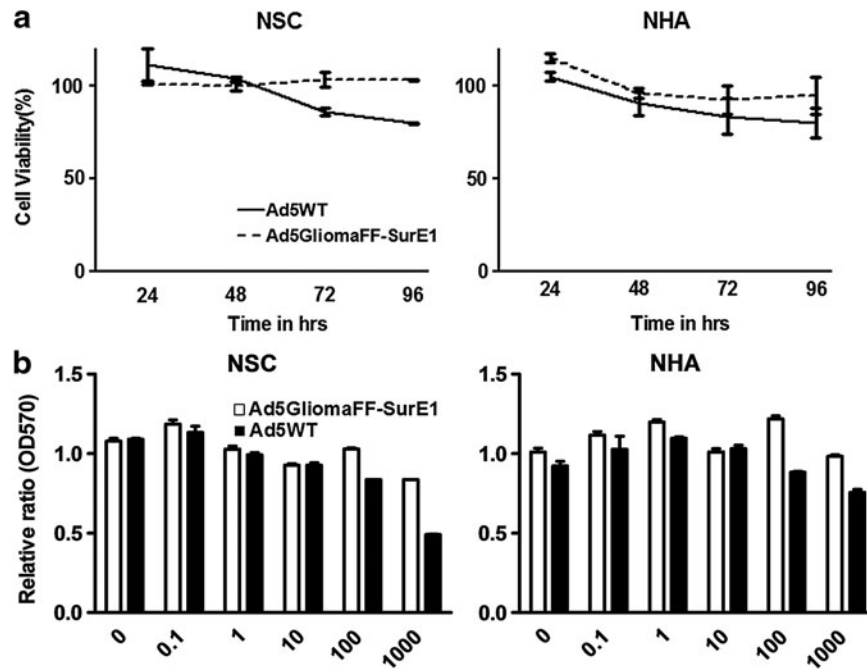

**Supplementary Figure S2.** Lack of lytic activity of Ad5GliomaFF-SurE1 on nonneoplastic cells. **(a)** MTT assay and **(b)** crystal violet staining were performed the same way as depicted in Fig. 5 with NHA and NSC. Each data point and each column is the average of three independent replicates. Means  $\pm$  SEM are plotted.
