# Supplementary material
Source: PubMed Central journal article supplement (PMC4575547)
Supplement: Supp_Figure3.pdf [file Supp_Figure3.pdf]

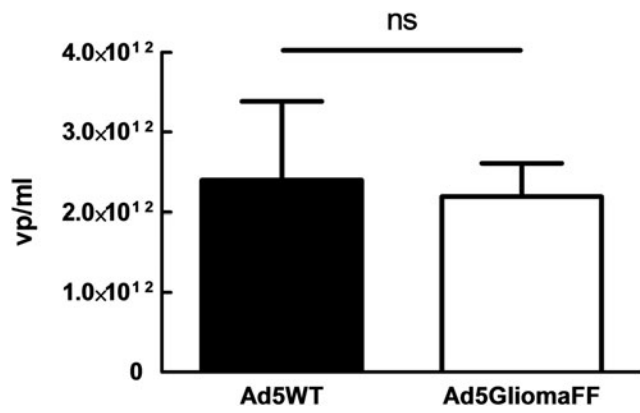

**Supplementary Figure S3.** Virus production efficiency of Ad5GliomaFF. Both Ad5WT and Ad5GliomaFF were propagated, purified, and titrated as described in Materials and Methods. Each data point and each column is the average of three independent replicates. Means  $\pm$  SEM are plotted.

---
