# Supplementary material
Source: PubMed Central journal article supplement (PMC4575547)
Supplement: Supp_Table1.pdf [file Supp_Table1.pdf]

**Supplementary Table S1. Primer Sets for qPCR**

---

| <i>Name</i>      | <i>Forward (5' → 3')</i> | <i>Reverse (5' → 3')</i>  |
|------------------|--------------------------|---------------------------|
| 1: E1A           | AACCAGTTGCCGTGAGAGAGTTG  | CTCGTTAAGCAAGTCCTCGATACAT |
| 2: E1B           | GAGTTGGCTTTAAGTTAATGAG   | AGTGAATATTTCTCCTGC        |
| 3: pTP           | AAACCAACGCTCGGTGCC       | GGACGCGGTTCCAGATGTT       |
| 4: Fiber<br>tail | CTCCAACGTGCCTTTTC        | GGCTCACAGTGGTTACATT       |

---
